# Supplementary material for: BAP1 complex promotes transcription by opposing PRC1-mediated H2A ubiquitylation
Source: PubMed Central journal article supplement (PMC6341105; doi:10.1038/s41467-018-08255-x), 2019-01-21
Supplement: 41467_2018_8255_MOESM1_ESM.pdf [file 41467_2018_8255_MOESM1_ESM.pdf]

## **BAP1 complex promotes transcription by opposing PRC1-mediated H2A ubiquitylation**

Campagne *et al.*

### **Content:**

|                         |                                        |
|-------------------------|----------------------------------------|
| Supplementary Figure 1  |                                        |
| Supplementary Figure 2  |                                        |
| Supplementary Figure 3  |                                        |
| Supplementary Figure 4  |                                        |
| Supplementary Figure 5  |                                        |
| Supplementary Figure 6  |                                        |
| Supplementary Figure 7  | (raw data for Figure 1C)               |
| Supplementary Figure 8  | (raw data for Figure 2B and 2D)        |
| Supplementary Figure 9  | (raw data for Figure 3A)               |
| Supplementary Figure 10 | (raw data for Figure 4B)               |
| Supplementary Figure 11 | (raw data for Figure 6A and 6B)        |
| Supplementary Figure 12 | (raw data for Figure S1A and S1B)      |
| Supplementary Figure 13 | (raw data for Figure S2A, S2B and S2E) |
| Supplementary Figure 14 | (raw data for Figure S5A)              |

Supplementary Table 1

Supplementary Table 2

Supplementary Methods

Supplementary bibliography

**Figure S1**

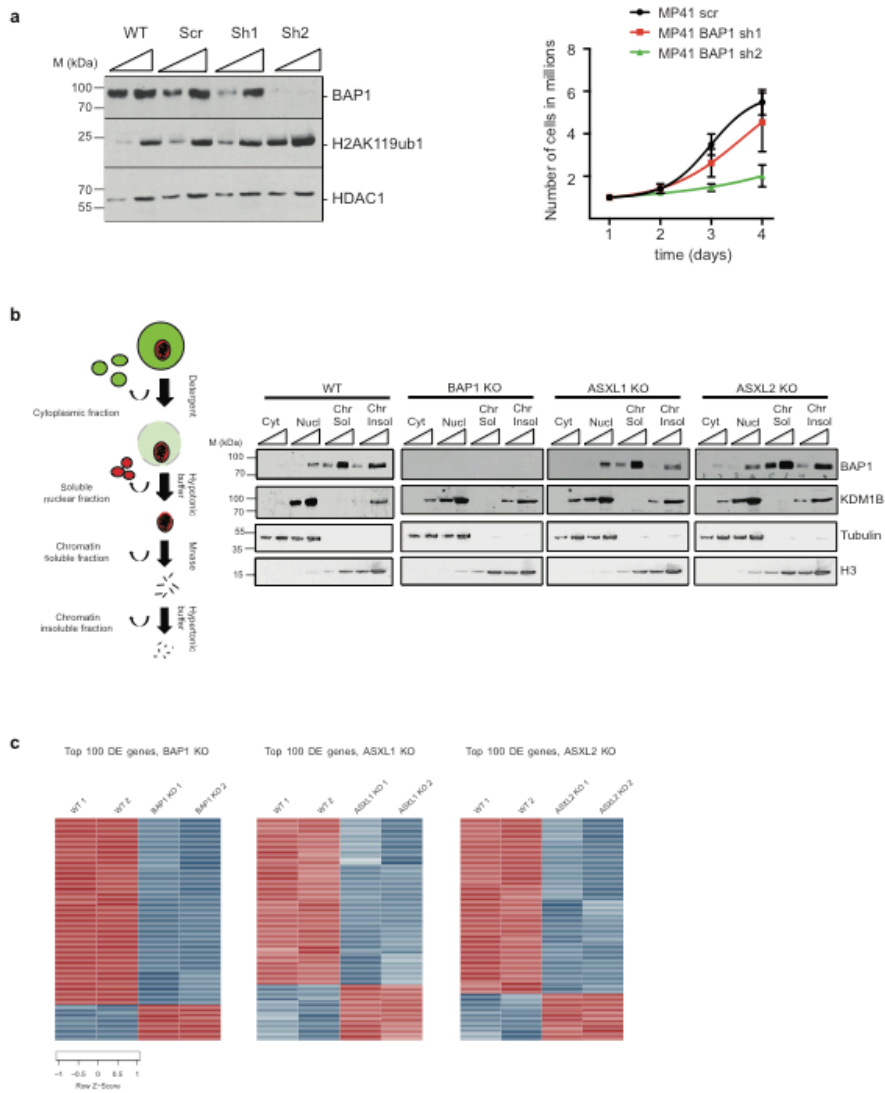

**Figure S1: BAP1.com activity**

**a)** RNA interference against *BAP1* in MP41 cells. Left panel: MP41 were infected with lentivirus containing shRNAs and nuclear extracts were analyzed by western blot. Scr = sh-scramble. A two-point titration (1:3 ratio) is shown for each condition. Right panel: proliferation assay in wild type or BAP1-silenced MP41 cells. Figures represent the mean of 3 independent biological replicates. Error bars represent the standard deviation between the replicates. **b)** Left panel: scheme summarizing the fractionation strategy for the isolation of chromatin-interacting proteins. Right panel: Western blots assessing the distribution of BAP1 and KDM1B in the different cellular compartments and chromatin fractions in HAP1 wild type and knockout cells. Tubulin and Histone H3 serve as controls for the cytoplasmic and chromatin associated fractions respectively. Two quantities were loaded for each condition, respecting a 1:3 ratio. **c)** Heatmap of 100 top differentially expressed (DE) genes in *BAP1*, *ASXL1*, and *ASXL2* KO cells. Individual replicates are shown side by side.



**Figure S2**

**a**

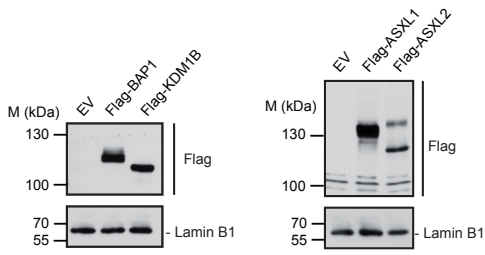

**b**

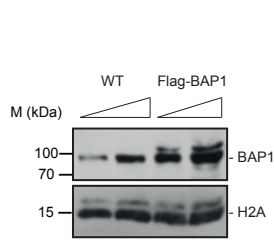

| Protein | Number of peptides |         |
|---------|--------------------|---------|
|         | Samples            | Control |
| ASXL2   | 31                 | 0       |
| HCFC1   | 30                 | 0       |
| BAP1    | 21                 | 0       |
| KDM1B   | 13                 | 0       |
| ASXL1   | 10                 | 0       |
| FOKK1   | 7                  | 0       |
| FOKK2   | 7                  | 0       |
| OGT     | 20                 | 13      |
| YY1     | 7                  | 0       |

**c**

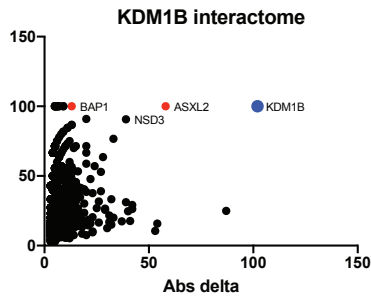

**d**

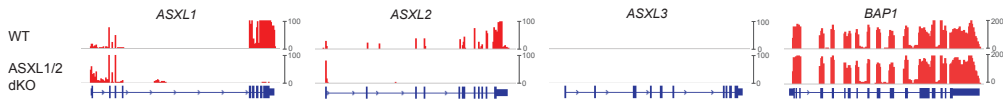

**e**

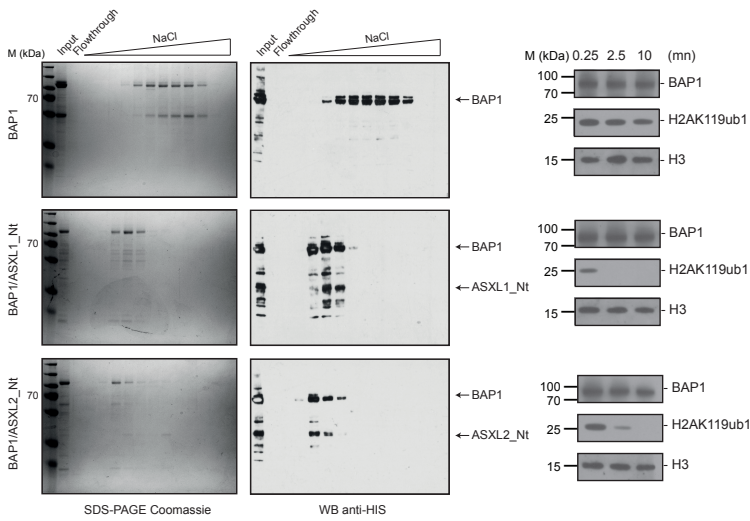

**f**

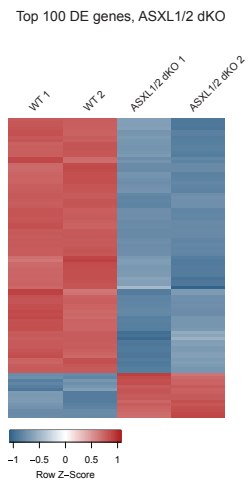

**Figure S2: BAP1.com composition.**

**a)** Western blot analysis of nuclear extracts from HeLa cells expressing Flag-tagged constructs or empty vector as control. Lamin B1 was used as a loading control. **b)** Left panel: western blot showing overexpression of Flag-BAP1 in MP41 nuclear extracts. H2A was used as a loading control. Right panel: table recapitulating mass spectrometry result of Flag-BAP1 IP as control to control in MP41 cells. **c)** Mass spectrometry analysis of HeLa cells overexpressing FLAG-tagged KDM1B. Graphs represent proteins relative to their absolute and relative delta compared to mass spectrometry analysis of empty vector expressing cells. **d)** Screenshots of RNA-seq on wild-type and ASXL1/2 dKO cells showing expression of ASXL1, ASXL2, ASXL3 (not expressed), and BAP1. **e)** Left panel: coomassie and corresponding western blot analyses showing the anion exchange purification of recombinant BAP1, BAP1+ASXL1\_Nt and BAP1+ASXL2\_Nt (Mono Q PC 0.1ml). The input is issued from a first Flag IP on whole cell extracts of SF9 expressing the different combinations of recombinant proteins. The asterisk represents a non-specific protein co-IPed with Flag-BAP1. Right panel: representative result of deubiquitinase assay following H2AK119 ubiquitination, western blot for BAP1 serves as a control. **f)** Heatmap of 100 top differentially expressed (DE) genes in ASXL1/2 dKO cells. Individual replicates are shown side by side.

**Figure S3**

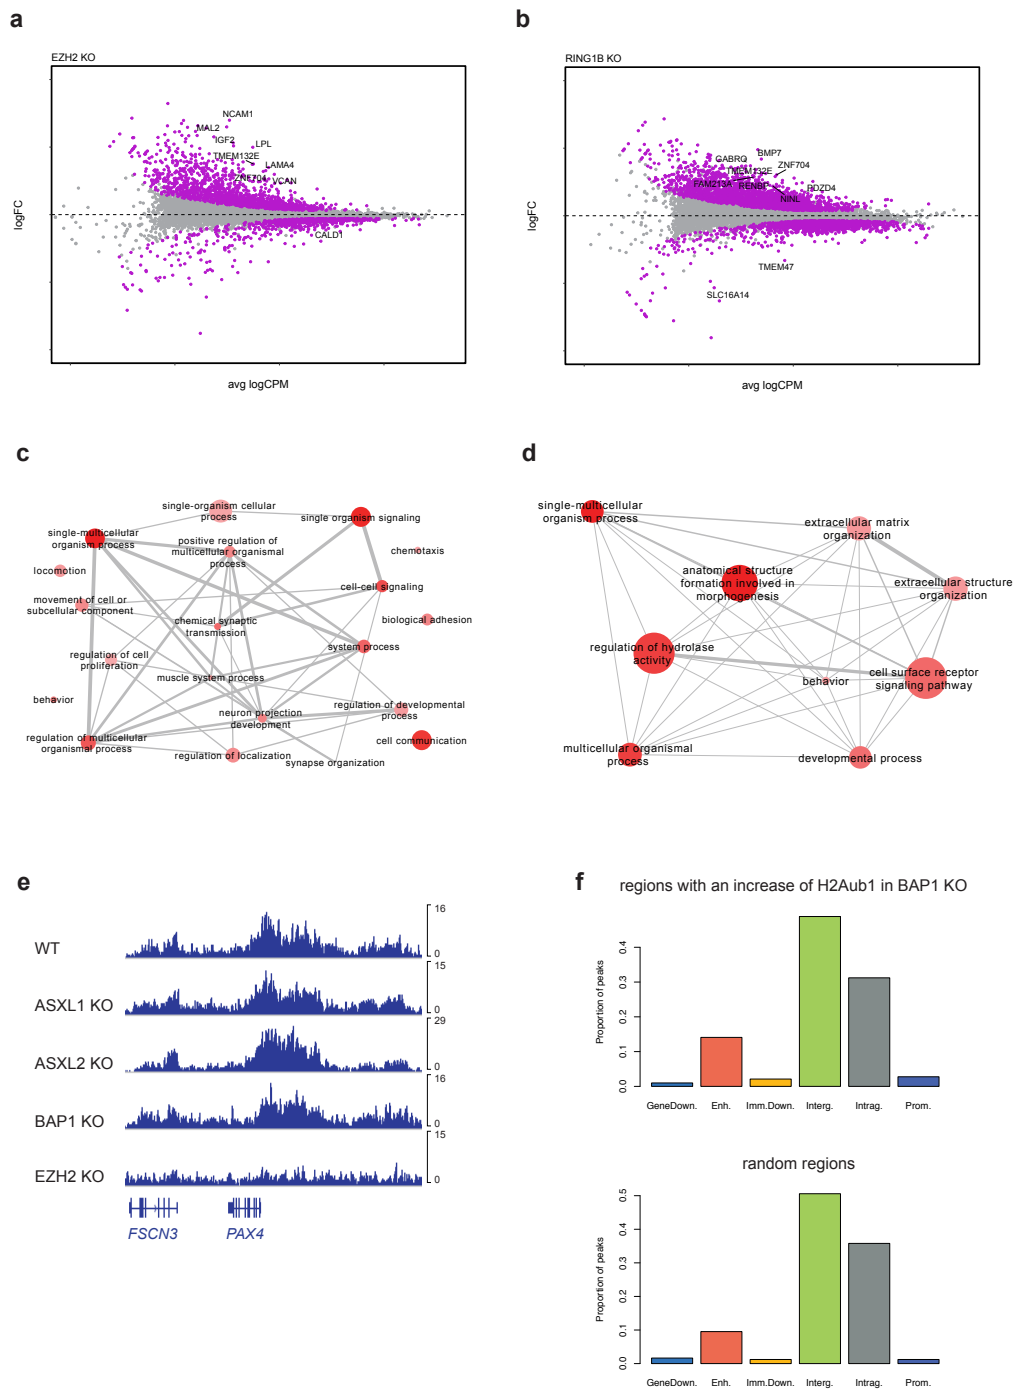

**Figure S3: BAP1 versus the Polycomb machinery**

**a, b** Scatterplots showing log<sub>2</sub> fold-change (logFC) expression between wild-type and *EZH2* KO (a) or *RING1B* KO (b) cells as a function of average log<sub>2</sub> counts per million (logCPM). Differentially expressed genes (DEGs) are highlighted in magenta. **c, d** Gene ontology analysis of DEGs in *EZH2* KO (c) and *RING1B* KO (d) cells. **e** Screenshot showing H3K27me<sub>3</sub> enrichment at the *PAX4* locus in the different conditions indicated on the left. **f** Annotation of regions that gain H2AK119ub1 upon *BAP1* KO (top panel) versus a random permutation of the same regions over the human genome (bottom panel).

Figure S4

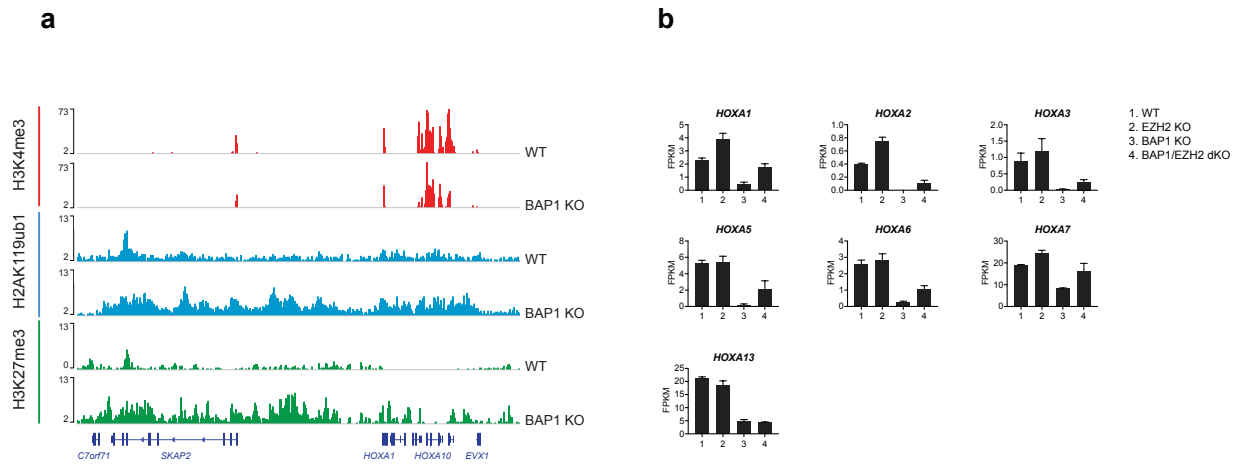

Figure S4: BAP1 versus PRC2

**a)** Screenshot showing enrichment for H3K4me3, H2AK119ub1 and H3K27me3 at the HOXA cluster in wild-type and *BAP1* KO cells. **b)** Expression of the individual HOXA genes represented as column bar graphs across wild-type, *EZH2*, *BAP1* and *BAP1/EZH2* KO conditions detected from corresponding RNA-seq data. Mean + SD, n=2.

**Figure S5**

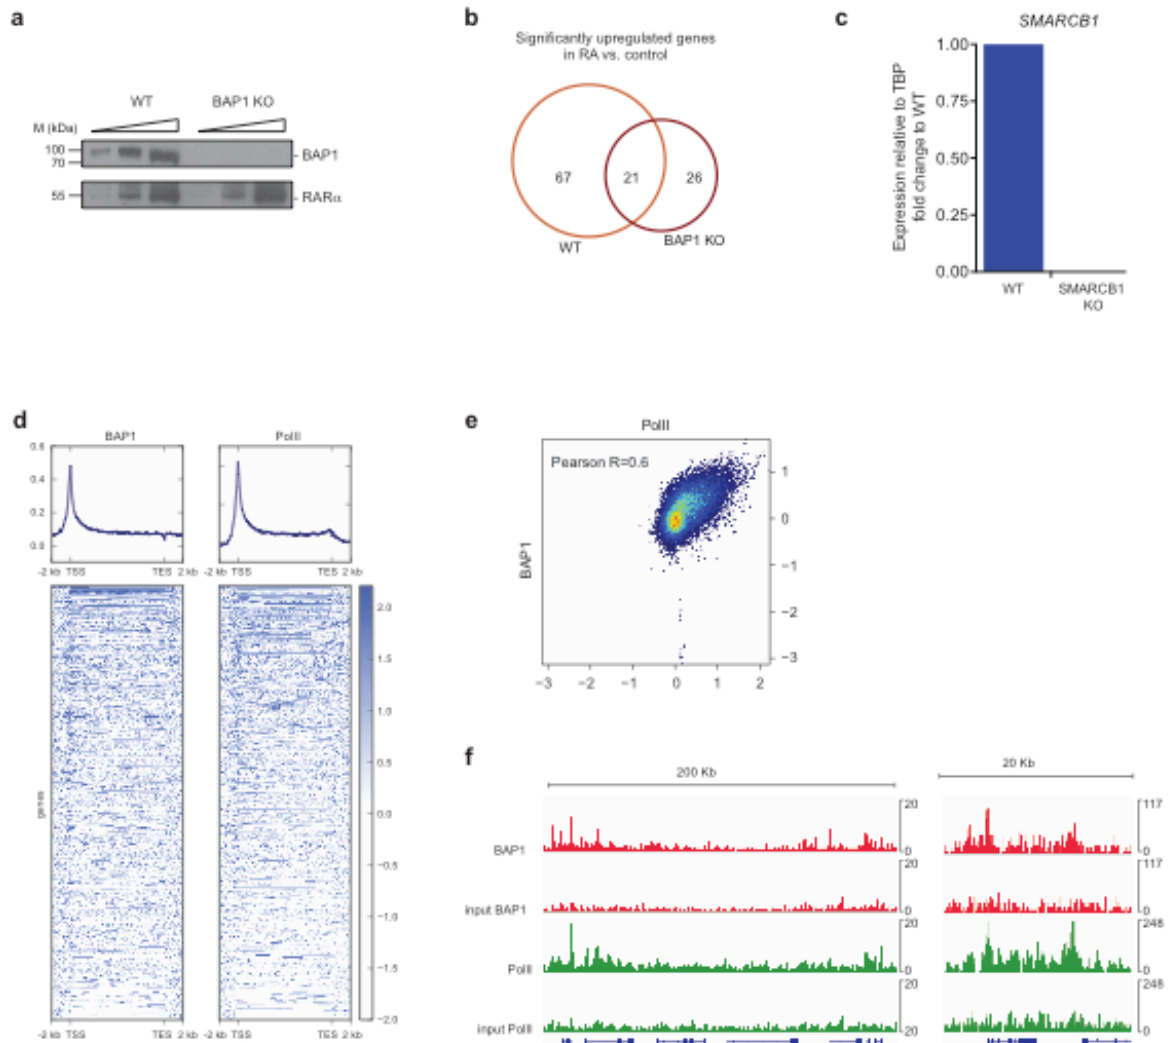

**Figure S5: BAP1 and transcription**

**a)** Titration of nuclear extracts from wild-type or *BAP1* KO HAP1 cells analyzed by western blot and probed with antibodies recognizing either BAP1 or RAR $\alpha$ . **b)** Venn diagram showing the overlap between RA-regulated genes in wild-type and BAP1 KO cells. **c)** RT-qPCR analysis SMARCB1 expression in the different in wild-type and SMARCB1 KO HAP1 cells. Mean  $\pm$  SD.  $n = 3$ . **d)** Heatmaps showing BAP1 and RNA PolII along gene bodies of all annotated genes from TSS to termination end site (TES) scaled to an equivalent 10 kb window and including 2 kb upstream and downstream of TSS and TES respectively. Corresponding average profiles are plotted on top of each heatmap. **e)** Scatterplot showing PolII versus BAP1 enrichment around the TSS ( $\pm$  2 kb) at all annotated genes in mouse Bone Marrow-Derived Macrophages. Pearson correlation coefficient is displayed. **f)** Screenshots of BAP1 and RNA PolII enrichment at representative regions. The input displayed below each corresponding ChIP-seq experiment.

**Figure S6**

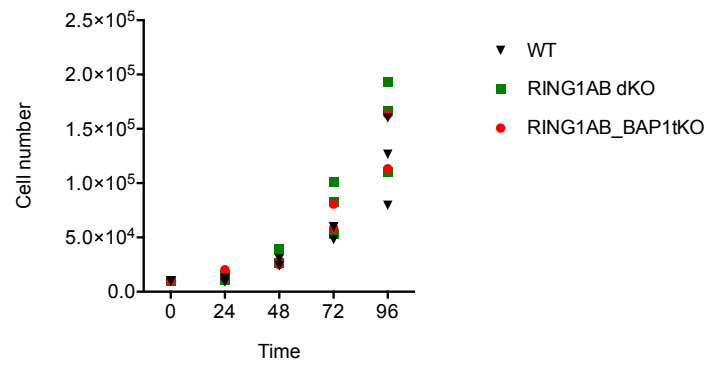

**Figure S6: BAP1 versus PRC1.**

Proliferation curve of wild-type, *RING1A/B* dKO and *RING1A/B;BAP1* KO HAP1 cells. n = 3.

**Figure S7**

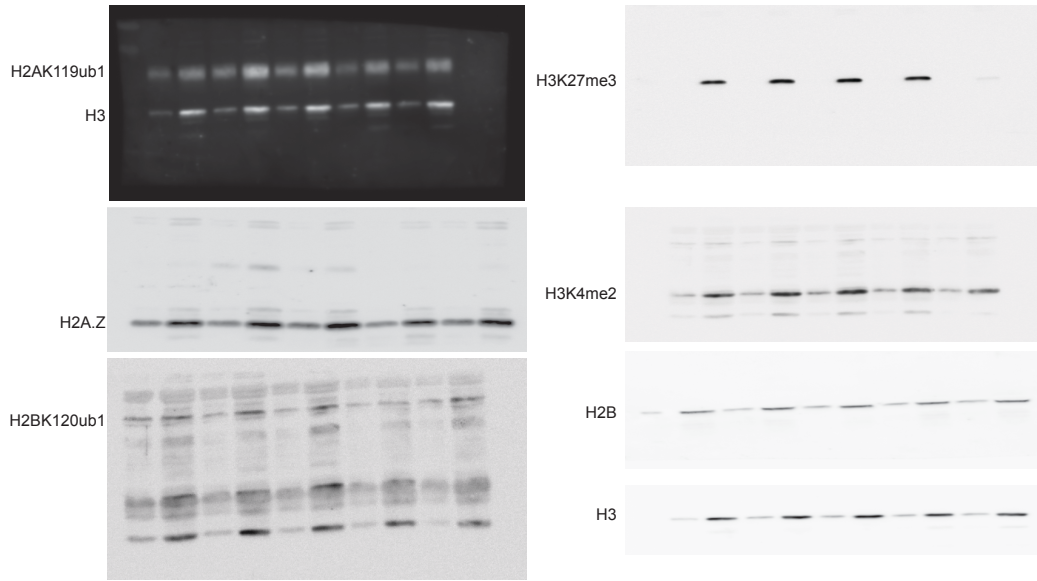

**Figure S7: raw data for Figure 1C**

**Figure S8**

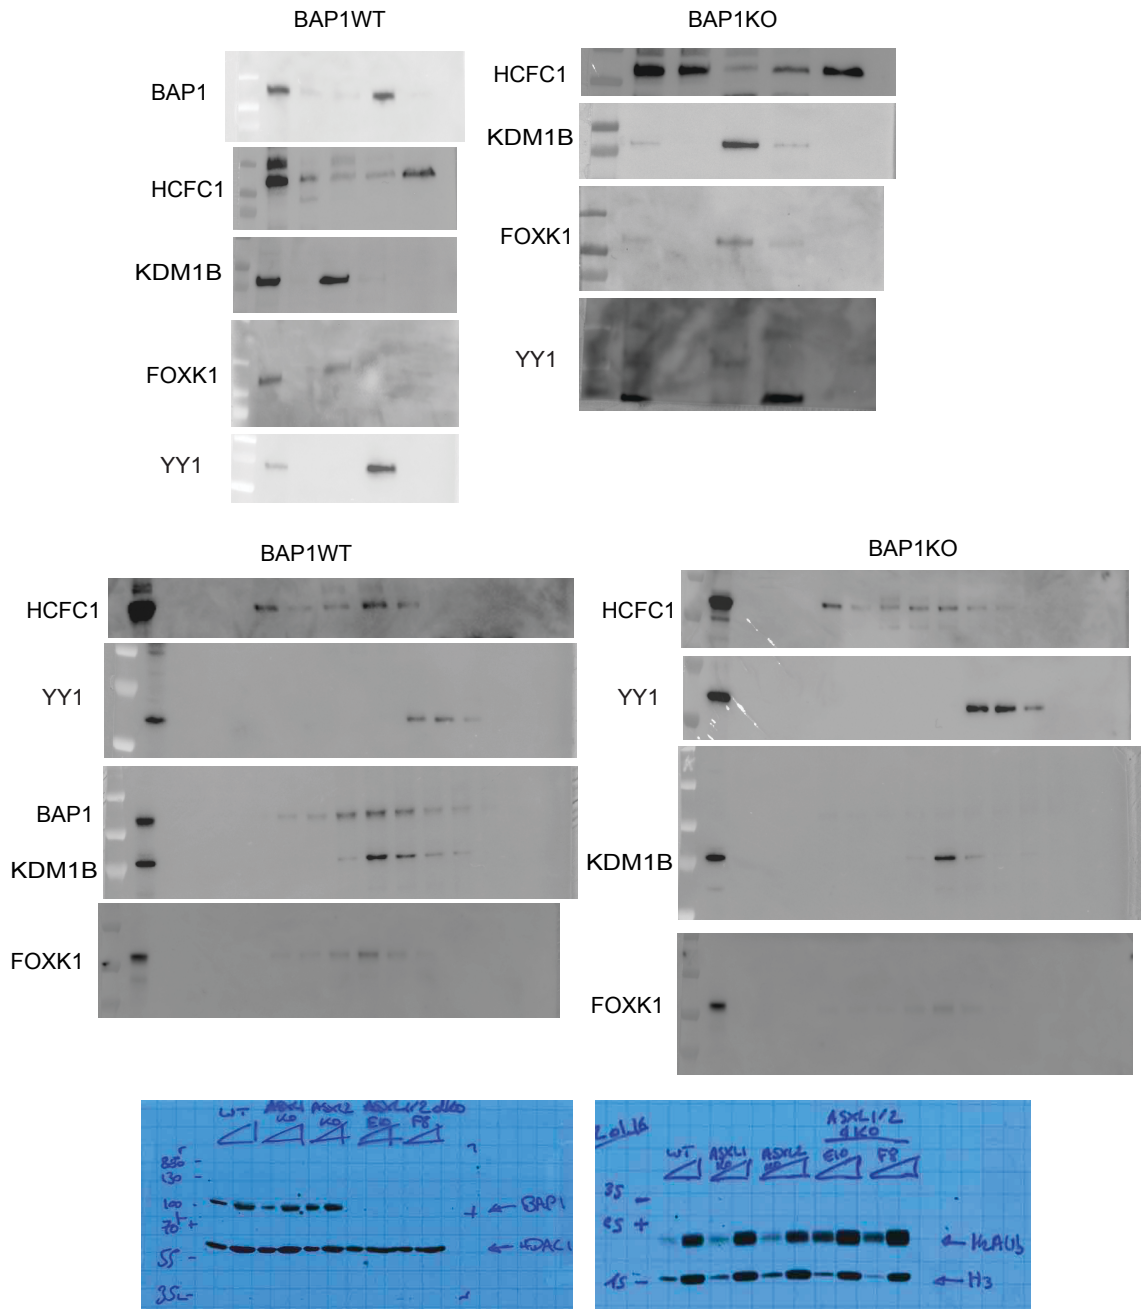

**Figure S8: raw data for Figure 2B and 2D**



Figure S9

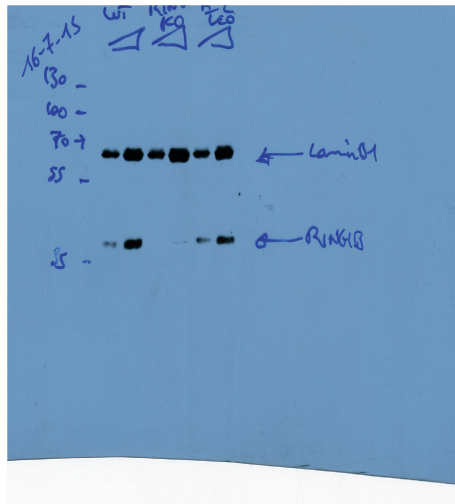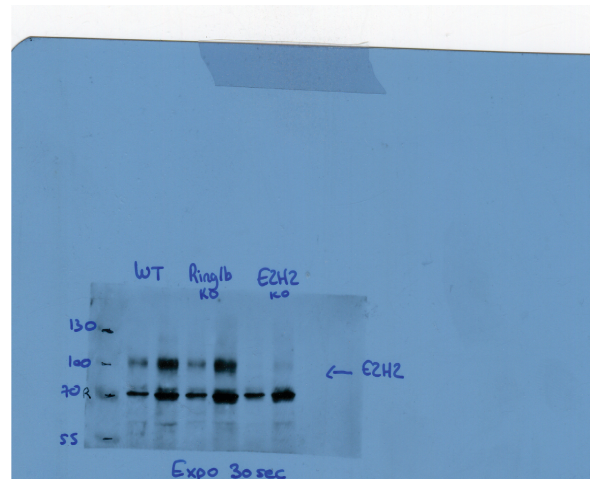

Figure S9: raw data for Figure 3A

**Figure S10**

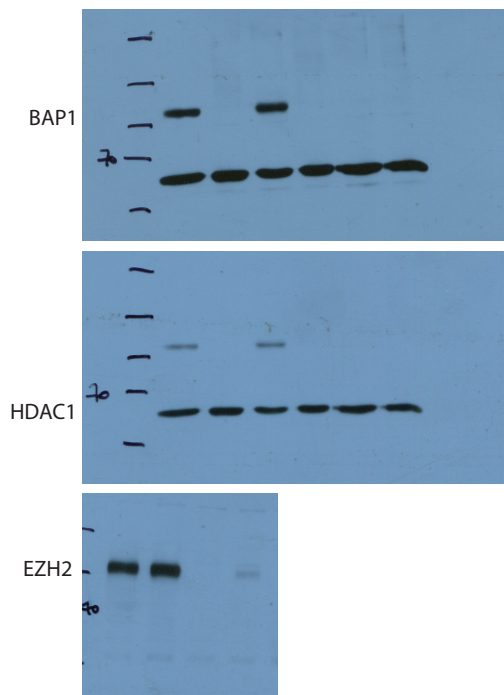

**Figure S10: raw data for Figure 4B**

Figure S11

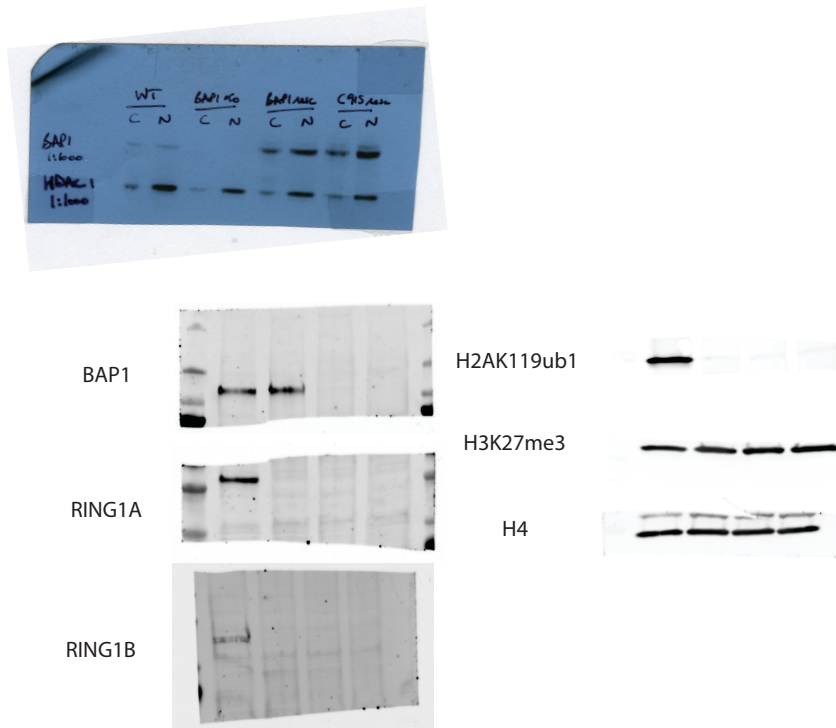

Figure S11: raw data for Figure 6A and 6B

Figure S12

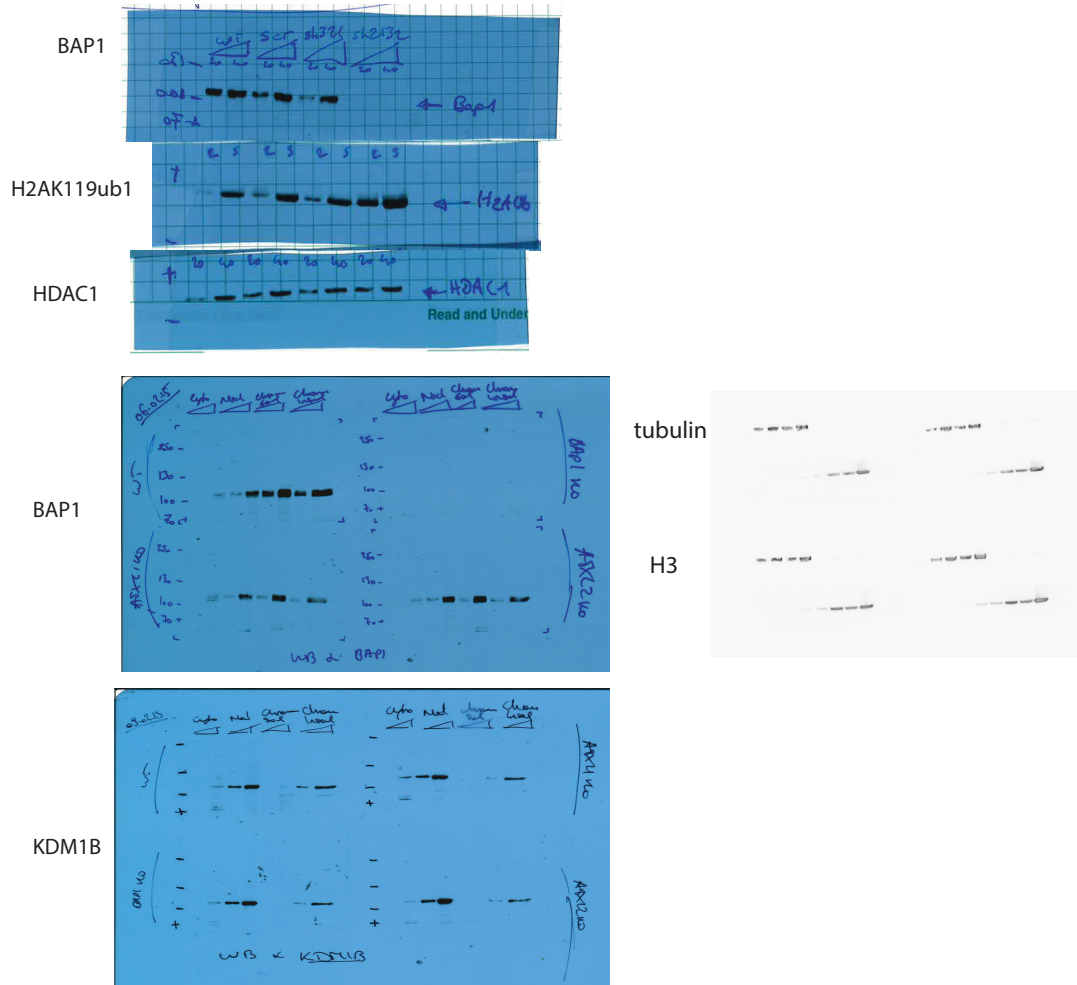

Figure S12: raw data for Figure S1A and S1B

Figure S13

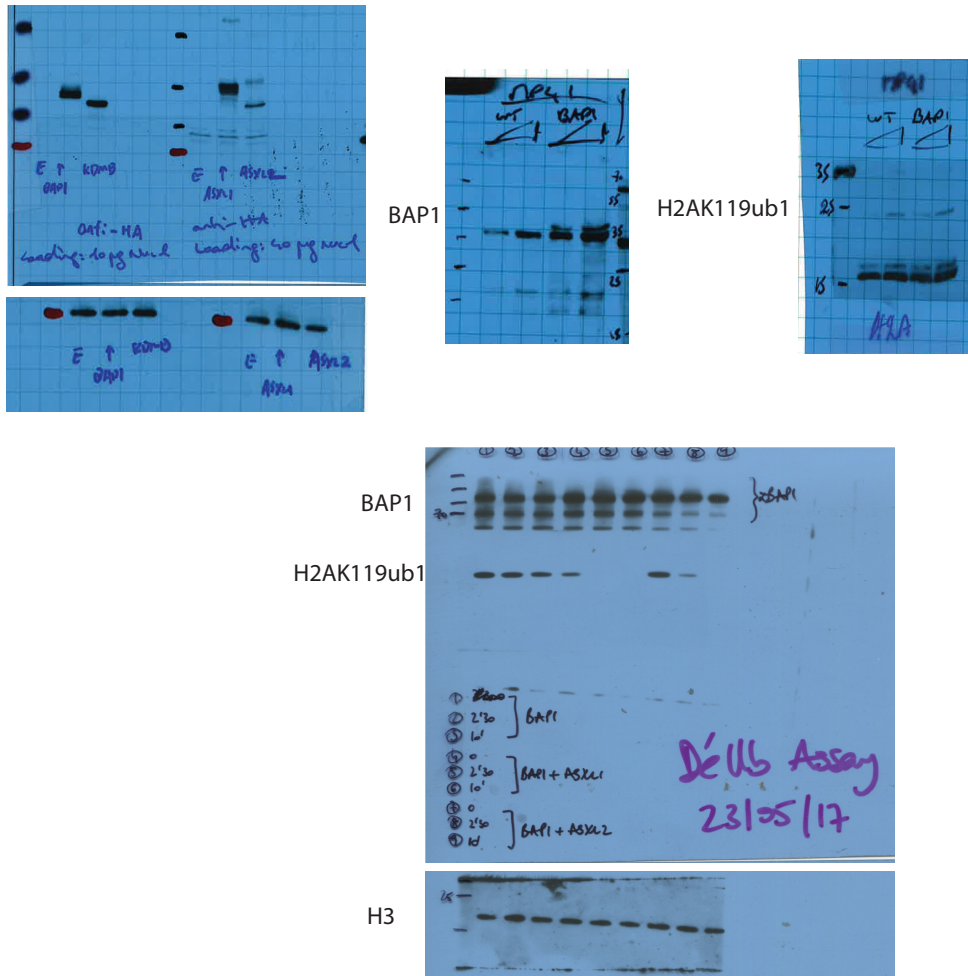

Figure S13: raw data for Figure S2A, S2B and S2E

Figure S14

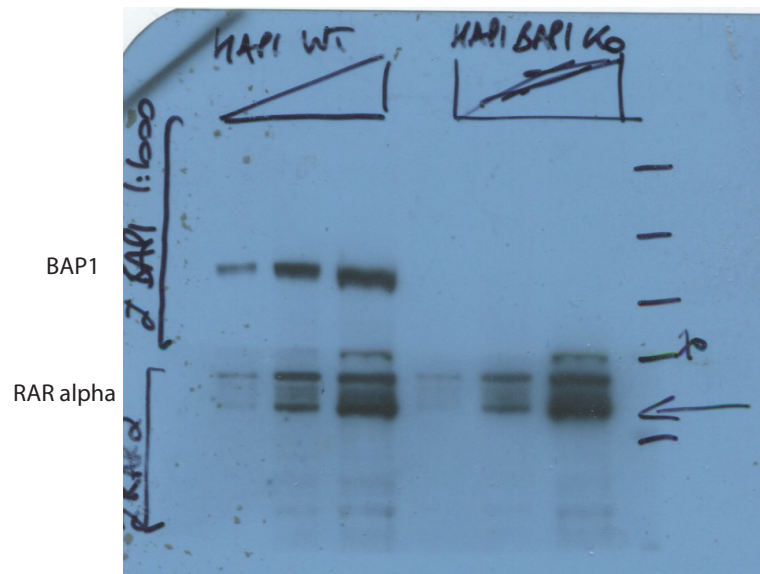

Figure S14: raw data for Figure S5A

| <b>primer</b> | <b>sequence</b>           |
|---------------|---------------------------|
| TBP_FW        | GTTCTGGGAAAATGGTGTGC      |
| TBP_REV       | GCTGGAAAACCCAACTTCTG      |
| SMARCB1_FW    | AGACCAGCGCGTCATCATCA      |
| SMARCB1_REV   | CAGCTCCGAGCACAGCTTCA      |
| EZH2_FW       | TTTTTGCCAAGAGAGCCATC      |
| EZH2_REV      | TCGATGCCGACATACTTCAG      |
| ASXL1_FW      | AAAGCCACAGCCCACTAAAG      |
| ASXL1_REV     | AGTGGGCTGACCTTTAACCAC     |
| ASXL2_FW      | GACAGAATCCAGGTGCGAAAAG    |
| ASXL2_REV     | TTCTGGCTCCTGTTCTGTTAGG    |
| BAP1_FW       | CCACAAGTCTCAAGAGTCACAG    |
| BAP1_REV      | CTGCACCATCTGTGTGGTT       |
| RARB_FW       | AGCAAGCCTCACATGTTTCC      |
| RARB_REV      | CTCTGCACcTTTAGCACTGATG    |
| CYP26A1_FW    | AACATTCGCGCCAAGATCTG      |
| CYP26A1_REV   | TGCTTTAGTGcTGCATGTC       |
| S100A11_FW    | TCGCTCAGCTCCAACATGGCAA    |
| S100A11_REV   | ACAGCAATCAGGGACTCGATGCAC  |
| TNFRSF1A_FW   | TGCCAGGAGAAACAGAACACCGT   |
| TNFRSF1A_REV  | AGGCACAACCTTCGTGCACTCCA   |
| TMSB4X_FW     | TCGCTTCGCTTTTCCTCCGCAA    |
| TMSB4X_REV    | GCCTGCTTGCTTCTCCTGTTCAATC |
| DHRS3_FW      | CTACTGCACATCCAAAGCGTC     |
| DHRS3_REV     | GGGAAACCTGACTCTCATGCC     |
| FAM46A_FW     | CTGGACTGCCTGTTGGACTTC     |
| FAM46A_REV    | TCCATCGGTCAGAGTCATTGC     |

**Supplementary table 1:** Primer sequences used for RT-qPCR analysis

RNA-seq

| ID       | NAME              | TOTAL    | MAPPED   | DUPLICATION RATE |
|----------|-------------------|----------|----------|------------------|
| B140T5   | A1_1              | 70241530 | 69450520 | 0.15             |
| B140T6   | A1_2              | 64937844 | 64203469 | 0.14             |
| B140T7   | A2_1              | 58673448 | 57958778 | 0.15             |
| B140T8   | A2_2              | 53059964 | 52345028 | 0.13             |
| B178T11  | ASXL1_2_KO_1      | 67091976 | 65946970 | 0.14             |
| B178T12  | ASXL1_2_KO_2      | 54790946 | 54118638 | 0.13             |
| B140T3   | B_1               | 63357286 | 62600276 | 0.15             |
| B140T4   | B_2               | 57635620 | 56811726 | 0.13             |
| A733T146 | B_EC2dKOcontrol_1 | 24281347 | 23941732 | 0.63             |
| A733T151 | B_EC2dKOcontrol_2 | 28806113 | 28311712 | 0.65             |
| A733T143 | B_EC2dKORA24h_1   | 31408623 | 31045728 | 0.65             |
| A733T152 | B_EC2dKORA24h_2   | 26898827 | 26484207 | 0.64             |
| B178T7   | BAP1_EZH2_KO_1    | 65846202 | 65017975 | 0.16             |
| B178T8   | BAP1_EZH2_KO_2    | 58402232 | 57109340 | 0.15             |
| B178T3   | BAP1_KO_1         | 54022002 | 53175371 | 0.13             |
| B178T4   | BAP1_KO_2         | 55476234 | 54567352 | 0.17             |
| B178T13  | BAP1_KO_3         | 59298136 | 58449034 | 0.14             |
| B178T14  | BAP1_KO_4         | 59040088 | 57956440 | 0.14             |
| B178T15  | BAP1_rescue_2     | 56640210 | 55663882 | 0.15             |
| B178T16  | BAP1_rescue_3     | 59806914 | 58635322 | 0.16             |
| A733T142 | BAP1KOcontrol_1   | 29799276 | 29478507 | 0.61             |
| A733T149 | BAP1KOcontrol_2   | 24683840 | 24423284 | 0.61             |
| A733T141 | BAP1KORA24h_1     | 26447921 | 26155065 | 0.59             |
| A733T150 | BAP1KORA24h_2     | 23339424 | 23041865 | 0.61             |
| B140T9   | E_1               | 74148166 | 72896586 | 0.16             |
| B140T10  | E_2               | 60561476 | 59849531 | 0.13             |
| B178T9   | EZH2_BAP1_KO_1    | 62641432 | 61827211 | 0.14             |
| B178T10  | EZH2_BAP1_KO_2    | 51817994 | 51068947 | 0.13             |
| B178T5   | EZH2_KO_1         | 59706336 | 58712569 | 0.13             |
| B178T6   | EZH2_KO_2         | 62309352 | 61359293 | 0.14             |
| B140T11  | R_1               | 66889238 | 65806493 | 0.13             |
| B140T12  | R_2               | 63433256 | 62060800 | 0.13             |
| B140T1   | W_1               | 66790126 | 65956987 | 0.15             |
| B140T2   | W_2               | 56378590 | 55652212 | 0.14             |
| B178T1   | WT_1              | 48609558 | 47885617 | 0.13             |
| B178T2   | WT_2              | 54067260 | 53298331 | 0.15             |
| A733T144 | WTcontrol_1       | 24508360 | 24275817 | 0.62             |
| A733T147 | WTcontrol_2       | 26780729 | 26551175 | 0.63             |
| A733T145 | WTRA24h_1         | 24723651 | 24443565 | 0.61             |
| A733T148 | WTRA24h_2         | 27751900 | 27449448 | 0.63             |



ChIP-seq

| ID      | NAME     | TOTAL    | MAPPED   | DUPLICATION RATE |
|---------|----------|----------|----------|------------------|
| B139C13 | A1_K27_1 | 44631872 | 43672079 | 0.05             |
| B139C14 | A1_K27_2 | 43962771 | 42998869 | 0.05             |
| B139C15 | A1_K4_1  | 43736044 | 42624486 | 0.08             |
| B139C16 | A1_K4_2  | 58785798 | 57249240 | 0.07             |
| B139C17 | A1_Ub_1  | 61794710 | 60499768 | 0.05             |
| B139C18 | A1_Ub_2  | 61923203 | 60577687 | 0.05             |
| B139C19 | A2_K27_1 | 41963427 | 41224761 | 0.06             |
| B139C20 | A2_K27_2 | 43886633 | 43283990 | 0.06             |
| B139C21 | A2_K4_1  | 37705765 | 37064784 | 0.3              |
| B139C22 | A2_Ub_1  | 42531701 | 41783297 | 0.04             |
| B139C23 | A2_Ub_2  | 47786002 | 46990575 | 0.05             |
| B139C7  | B1_K27_1 | 37654429 | 36784099 | 0.06             |
| B139C8  | B1_K27_2 | 43611916 | 42610006 | 0.06             |
| B139C9  | B1_K4_1  | 46233393 | 45066997 | 0.09             |
| B139C10 | B1_K4_2  | 43836218 | 42622688 | 0.07             |
| B139C11 | B1_Ub_1  | 58753665 | 57660167 | 0.05             |
| B139C12 | B1_Ub_2  | 49537001 | 48526449 | 0.04             |
| B139C24 | E2_K27_1 | 38119713 | 37044115 | 0.07             |
| B139C25 | E2_K27_2 | 43338116 | 42150861 | 0.09             |
| B139C26 | E2_K4_1  | 43621734 | 42502791 | 0.09             |
| B139C27 | E2_K4_2  | 52617910 | 51236451 | 0.07             |
| B139C28 | E2_Ub_1  | 47589844 | 46541422 | 0.05             |
| B139C29 | E2_Ub_2  | 42187354 | 41171030 | 0.05             |
| B139C30 | RB_K27_1 | 39666722 | 38921385 | 0.08             |
| B139C31 | RB_K27_2 | 36743282 | 36222362 | 0.06             |
| B139C32 | RB_K4_1  | 32513561 | 31984090 | 0.3              |
| B139C33 | RB_Ub_1  | 34491103 | 33826182 | 0.04             |
| B139C34 | RB_Ub_2  | 34774245 | 34164733 | 0.05             |
| B139C1  | WT_K27_1 | 37461281 | 36604007 | 0.05             |
| B139C2  | WT_K27_2 | 36936404 | 36074797 | 0.05             |
| B139C3  | WT_K4_1  | 38014632 | 37022611 | 0.08             |
| B139C4  | WT_K4_2  | 38243693 | 37203001 | 0.07             |
| B139C5  | WT_Ub_1  | 41263065 | 40368888 | 0.05             |
| B139C6  | WT_Ub_2  | 39021850 | 38084567 | 0.05             |

Supplementary table 2: Mapping statistics for RNA-seq and ChIP-seq samples

## Supplementary methods

### Cell lines

MP41 cells were kindly provided by Dr S. Roman-Roman and cultured in RPMI media supplemented with 10% FBS and 1% L-Glutamine (Invitrogen).

### BAP1 knockdown

shRNA sequences targeting BAP1 were retrieved from the following publication <sup>1</sup> and cloned into pLKO.1 vector from addgene.

The target sequences are:

|             |                     |
|-------------|---------------------|
| shBAP1.321  | CGUCCGUGAUUGAUGAUGA |
| shBAP1.2132 | GAGUUCAUCUGCACCUUUA |

### Supplementary bibliography

1. Machida, Y.J., Machida, Y., Vashisht, A.A., Wohlschlegel, J.A. & Dutta, A. The deubiquitinating enzyme BAP1 regulates cell growth via interaction with HCF-1. *J Biol Chem* **284**, 34179-88 (2009).
